# Supplementary material for: Convenient syntheses and structural characterizations of mono-substituted alkylimido hexamolybdates: [Mo6O18(NR)]2−(R = Me, Et, n-Pr, i-Pr, n-Bu, t-Bu, Cy, Hex, Ode)
Source: Royal Society of Chemistry journal article supplement (doi:10.1039/b813924e), 2008-12-19
Supplement: b813924e.pdf [file b813924e.pdf]

## Convenient Syntheses and Structural Characterizations of

### Mono-substituted Alkylimido Hexamolybdates:

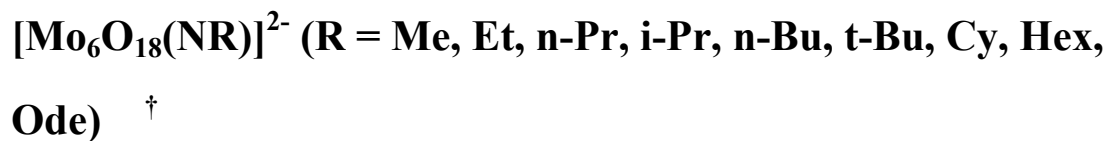

Qiang Li<sup>a</sup>, Longsheng Wang<sup>a</sup>, Panchao Yin<sup>a</sup>, Yongge Wei<sup>\* a</sup>, Jian Hao<sup>a</sup>, Yulin Zhu<sup>a</sup>, Li Zhu<sup>a</sup>, Gu Yuan<sup>b</sup>

Received (in XXX, XXX) Xth XXXXXXXXXX 200X, Accepted Xth XXXXXXXXXX 200X

First published on the web Xth XXXXXXXXXX 200X

DOI: 10.1039/b000000x

<sup>a</sup> Department of Chemistry, Tsinghua University, Beijing 100084, China E-mail: yonggewei@mail.tsinghua.edu.cn

<sup>b</sup> College of Chemistry and Molecular Engineering, Peking University, Beijing 100871, PR China

<sup>†</sup>Electronic Supplementary Information (ESI) available: [Listing of X-ray crystallographic data in CIF format]. See DOI: 10.1039/b000000x/

Table S1 Summary of crystallographic data for compounds **5** and **7I**.

|                                           | <b>5</b>                                                                       | <b>7I</b>                                                                      |
|-------------------------------------------|--------------------------------------------------------------------------------|--------------------------------------------------------------------------------|
| Formula                                   | C <sub>36</sub> H <sub>81</sub> Mo <sub>6</sub> N <sub>3</sub> O <sub>18</sub> | C <sub>38</sub> H <sub>83</sub> Mo <sub>6</sub> N <sub>3</sub> O <sub>18</sub> |
| F.W.                                      | 1419.68                                                                        | 1445.71                                                                        |
| Crys. Sys.                                | Orthorhombic                                                                   | Triclinic                                                                      |
| Space group                               | Pbca                                                                           | P-1                                                                            |
| <i>a</i> (Å)                              | 16.8504(8)                                                                     | 12.5288(4)                                                                     |
| <i>b</i> (Å)                              | 20.0036(10)                                                                    | 19.4569(6)                                                                     |
| <i>c</i> (Å)                              | 31.6503(15)                                                                    | 23.1302(7)                                                                     |
| $\alpha$ (°)                              | 90                                                                             | 93.7700(10)                                                                    |
| $\beta$ (°)                               | 90                                                                             | 103.1410(10)                                                                   |
| $\gamma$ (°)                              | 90                                                                             | 91.4990(10)                                                                    |
| <i>V</i> (Å <sup>3</sup> )                | 10668.3(9)                                                                     | 5474.0(3)                                                                      |
| <i>Z</i>                                  | 8                                                                              | 4                                                                              |
| $\rho_{\text{calc}}$ Mg/m <sup>3</sup>    | 1.768                                                                          | 1.754                                                                          |
| $\mu$ (mm <sup>-1</sup> )                 | 1.433                                                                          | 1.398                                                                          |
| Refl. collected                           | 48987                                                                          | 44067                                                                          |
| Unique refl. ( <i>R</i> <sub>int</sub> .) | 9378(0.0327)                                                                   | 18581(0.0302)                                                                  |
| <i>R</i> <sub>1</sub>                     | 0.0509                                                                         | 0.0559                                                                         |
| <i>wR</i> <sub>2</sub>                    | 0.1351                                                                         | 0.1483                                                                         |
| GOF                                       | 1.127                                                                          | 1.136                                                                          |

$R = \Sigma||F_o| - |F_c||/\Sigma|F_o|$  and  $Rw = [\Sigma[w(F_o^2 - F_c^2)^2]/\Sigma w(F_o^2)^2]^{1/2}$  with  $w = 1/[\sigma^2(F_o^2) + (aP)^2 + bP]$ , where  $P = (F_o^2 + 2F_c^2)/3$  **5** :  $a = 0.0449$ ,  $b = 46.6940$ ; **7I** :  $a = 0.0434$ ,  $b = 21.3101$ .

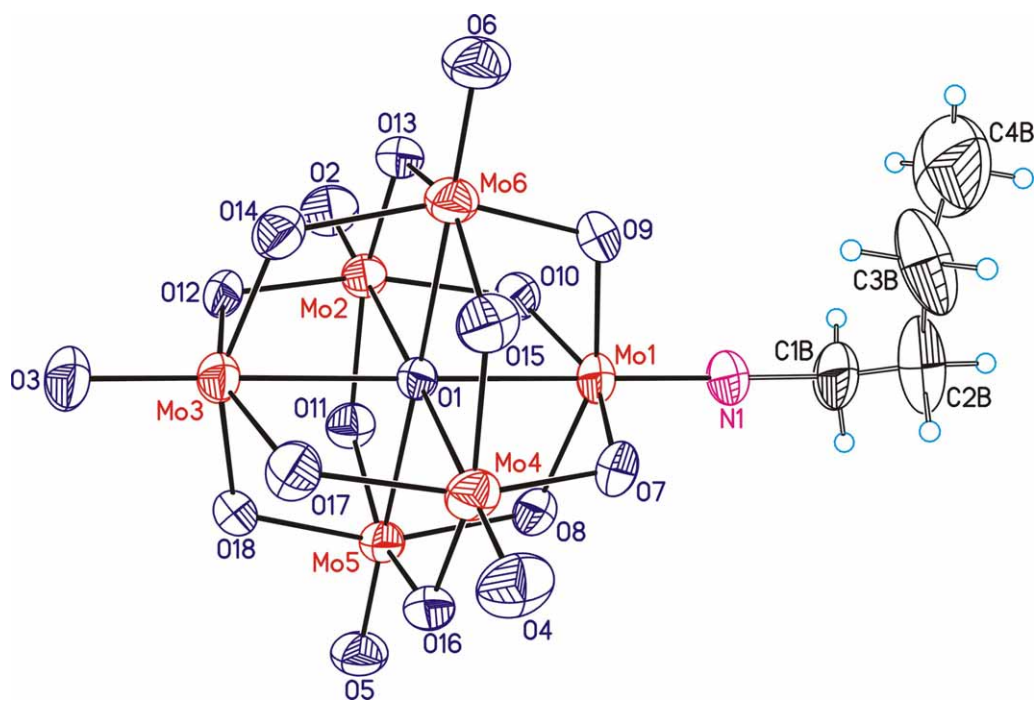

Figure S1. ORTEP drawing of the  $[\text{Mo}_6\text{O}_{18}(=\text{NR})]^{2-}$  anion of **5**

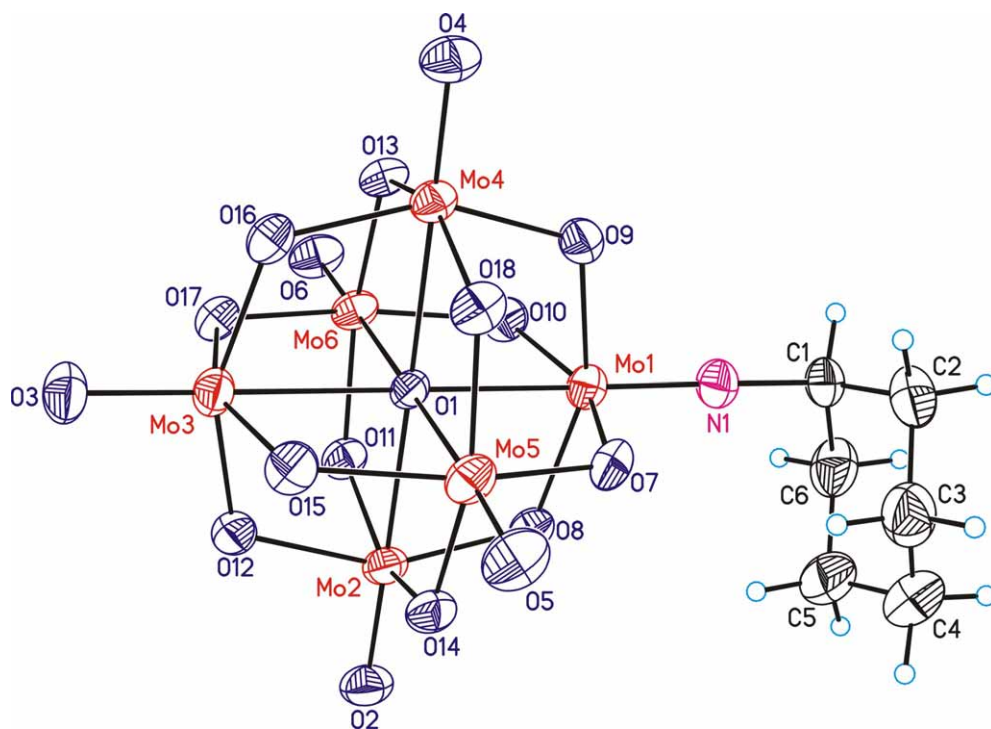

Figure S2. ORTEP drawing of the  $[\text{Mo}_6\text{O}_{18}(=\text{NR})]^{2-}$  anion of **7I**

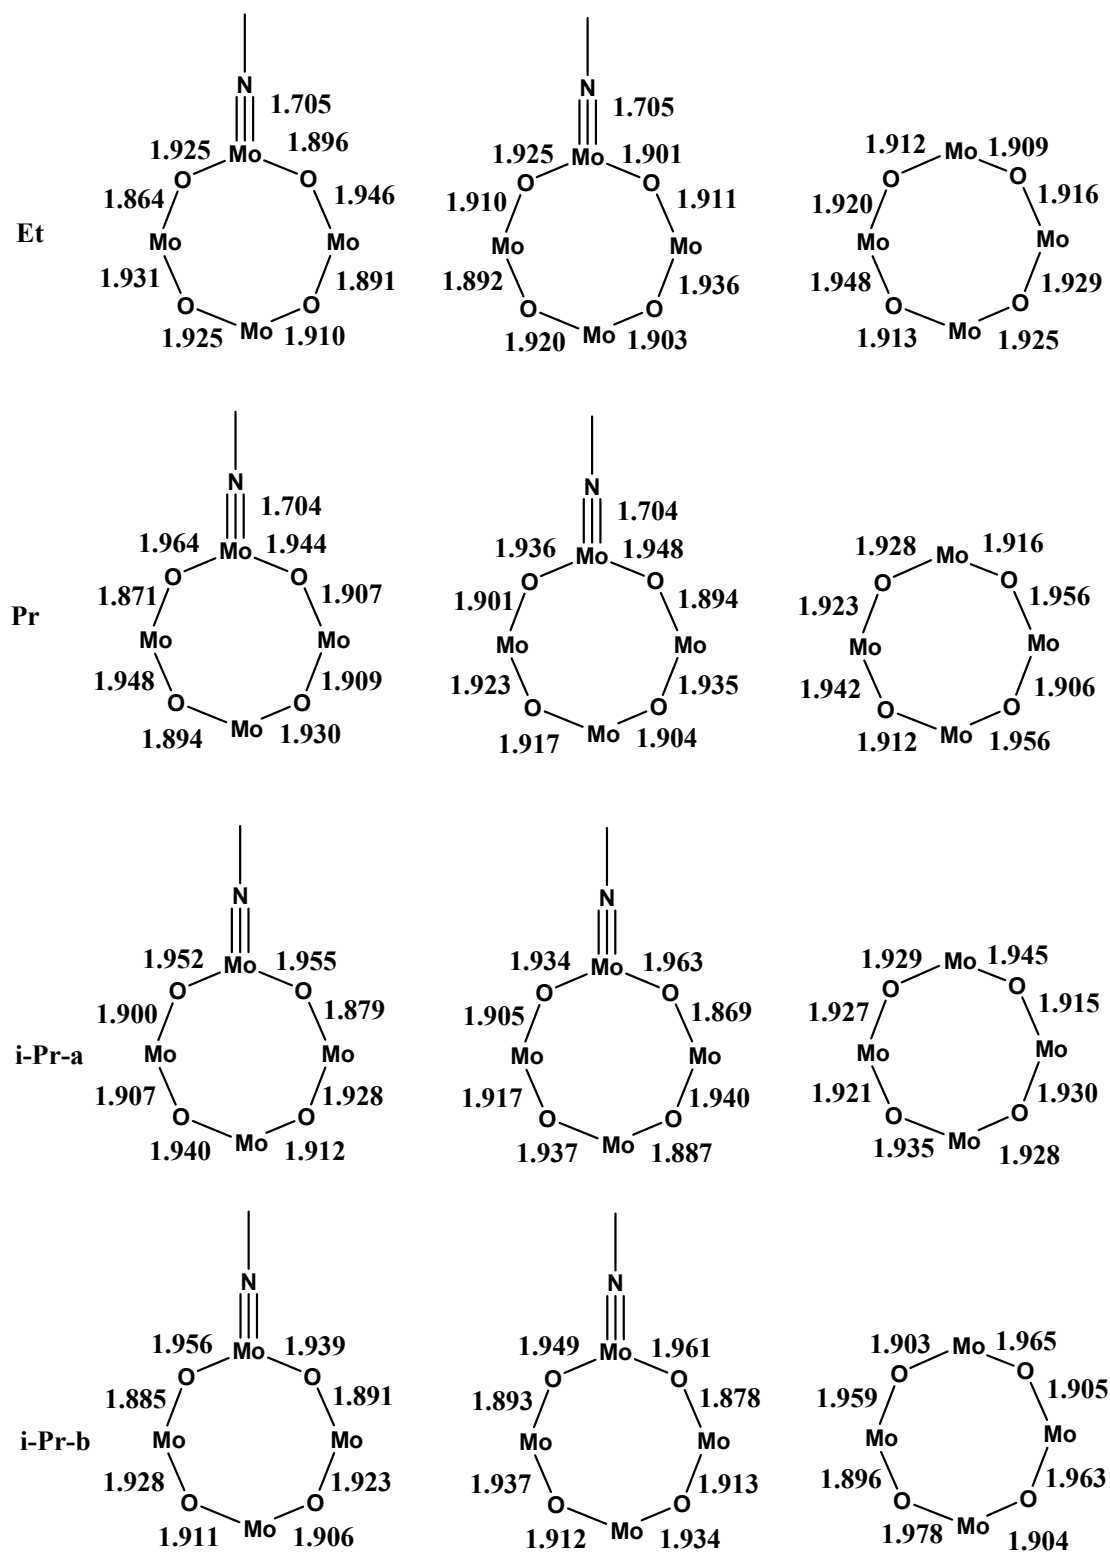

Figure S3. Bond length in the  $\text{Mo}_4(\text{O}_6)_4$  belts in compounds 2, 3, 4a and 4b

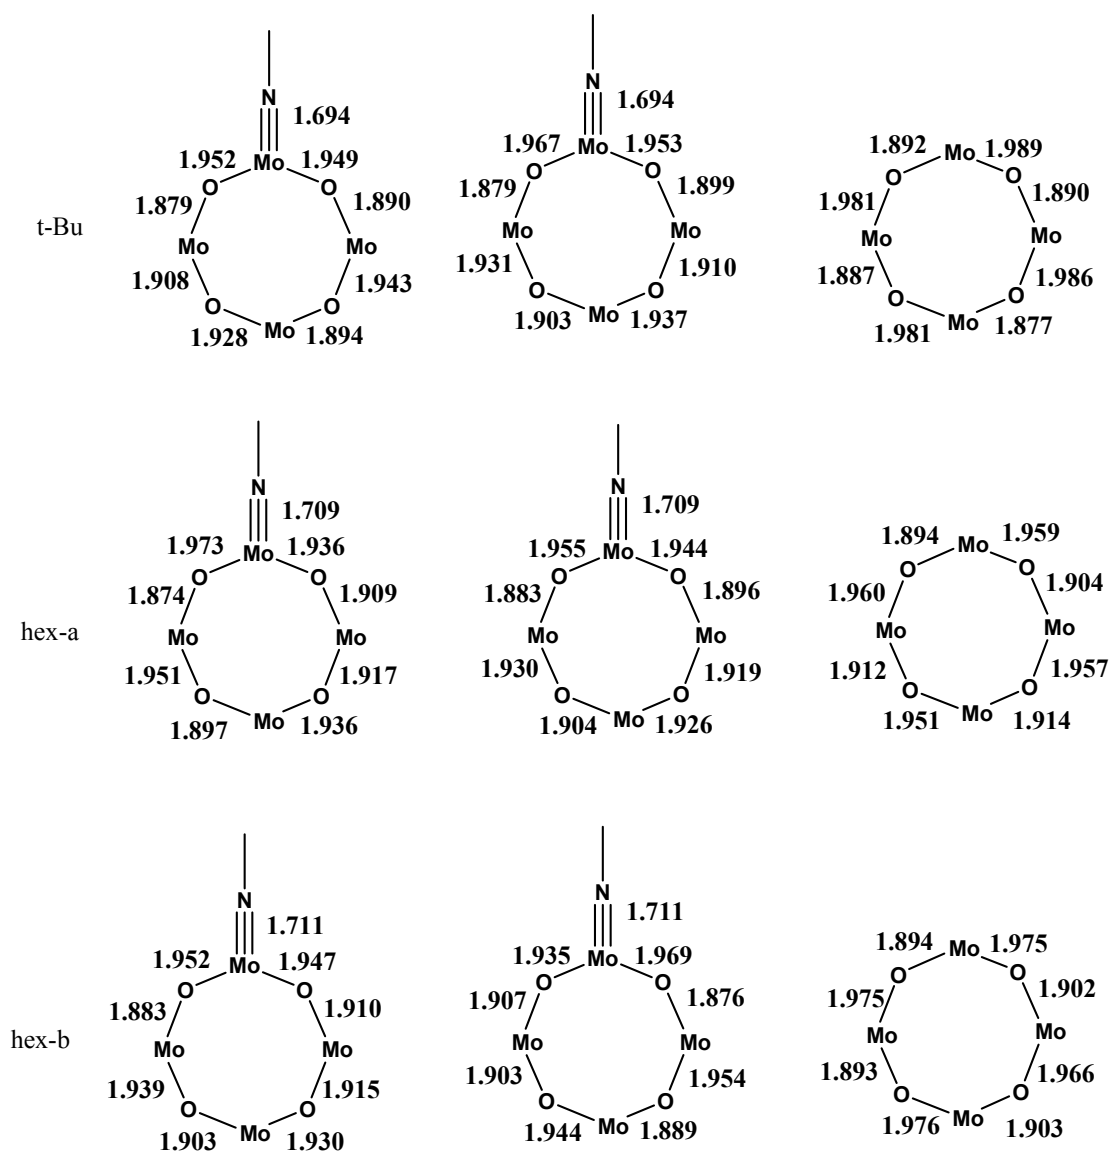

Figure S4. Bond length in the  $\text{Mo}_4(\text{O}_6)_4$  belts in compounds **6**, **8a** and **8b**.
